# Supplementary material for: Fluorination effects on bithiophene unit in benzodithiophene-4,8-dione based D–A type alternating copolymers for highly efficient polymer solar cells
Source: Royal Society of Chemistry journal article supplement (doi:10.1039/d2ra05925h), 2022-01-01
Supplement: d2ra05925h1.pdf [file d2ra05925h1.pdf]

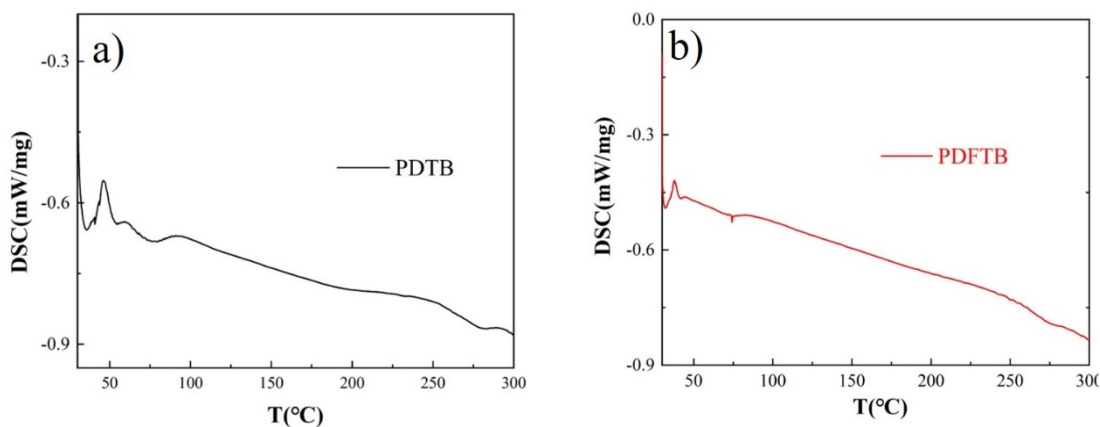

**Figure S1** DSC curve of PDTB (a) and PDFTB (b)

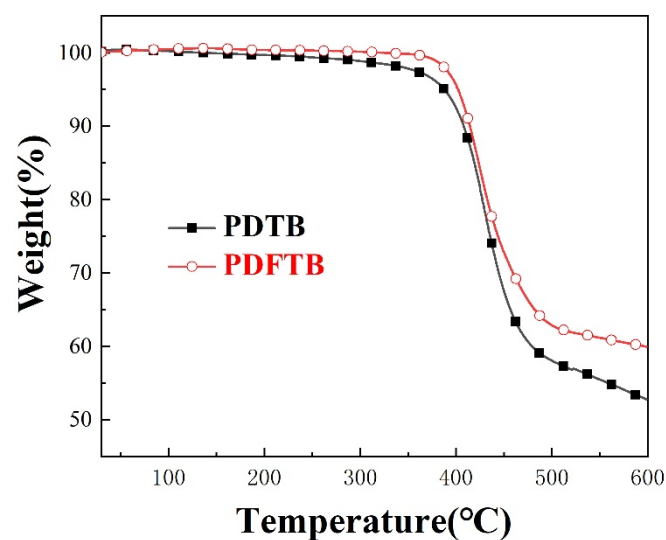

**Figure S2** TGA curve of PDTB and PDFTB

**Table S1** Photovoltaic parameters of polymer: ITIC based PSC devices with the D:A weight ratios from 1 : 0.8 to 1 : 1.2

| Polymer | D:A   | $V_{OC}$ (V) | $J_{SC}$ (mA cm <sup>-2</sup> ) | FF(%) | PCE(%) <sup>a</sup> |
|---------|-------|--------------|---------------------------------|-------|---------------------|
| PDTB    | 1:0.8 | 0.62         | 7.43                            | 52.2  | 2.40/2.21           |
|         | 1:1   | 0.63         | 8.15                            | 50.0  | 2.56/2.32           |
|         | 1:1.2 | 0.63         | 6.14                            | 56.2  | 2.17/2.05           |
|         | 1:0.8 | 0.81         | 10.61                           | 32.4  | 2.78/2.55           |

|       |      |       |      |           |
|-------|------|-------|------|-----------|
| 1:1   | 0.84 | 11.04 | 39.6 | 3.67/3.39 |
| 1:1.2 | 0.86 | 10.82 | 35.7 | 3.32/3.09 |

<sup>a</sup> The value stands for the maximum/average PCE obtained from no less than 6 devices.

**Table S2** Photovoltaic parameters of polymer: ITIC based PSC devices with different amount of DIO and thermal annealing based devices

| Polymer | DIO (%)           | $V_{OC}$ (V) | $J_{SC}$ (mA cm <sup>-2</sup> ) | FF(%) | PCE(%) <sup>b</sup> |
|---------|-------------------|--------------|---------------------------------|-------|---------------------|
| PDTB    | 0.25              | 0.64         | 8.17                            | 51.3  | 2.71/2.55           |
|         | 0.50              | 0.65         | 9.15                            | 60.1  | 3.59/3.22           |
|         | 0.50 <sup>a</sup> | 0.64         | 9.91                            | 60.1  | 3.81/3.58           |
|         | 0.75              | 0.64         | 9.24                            | 56.1  | 3.30/3.12           |
| PDFTB   | 0.25              | 0.83         | 12.01                           | 40.7  | 4.07/3.88           |
|         | 0.25 <sup>a</sup> | 0.86         | 12.28                           | 41.5  | 4.39/4.11           |
|         | 0.50              | 0.83         | 12.40                           | 37.0  | 3.82/3.45           |
|         | 0.75              | 0.86         | 11.66                           | 40.1  | 4.01/3.86           |

<sup>a</sup> The BHJ was annealed for 10 min at 100 °C after spin-coating. <sup>b</sup> The value stands for the maximum/average PCE obtained from no less than 6 devices.
